# Supplementary material
Source: MDPI journal article supplement (https://www.mdpi.com/2073-4344/8/10/476)
Supplement: s1 [file s1]

# Supplementary Materials

## Characterization of a New Glyoxal Oxidase from the Thermophilic Fungus *Myceliophthora thermophila* M77: Hydrogen Peroxide Production Retained in 5-Hydroxymethylfurfural Oxidation

Marco Antonio Seiki Kadowaki <sup>1,2</sup>, Mariana Ortiz de Godoy <sup>1,2</sup>, Patricia Suemy Kumagai <sup>1</sup>, Antonio José da Costa-Filho <sup>3</sup>, Andrew Mort <sup>2</sup>, Rolf Alexander Prade <sup>2,\*</sup> and Igor Polikarpov <sup>1,\*</sup>

<sup>1</sup> São Carlos Institute of Physics, University of São Paulo, Av. Trabalhador São-Carlense, 400 São Carlos 13566-590, Brazil; marcokadowaki@gmail.com (M.A.S.K.); marianaort@gmail.com (M.O.G.); patysuemy@gmail.com (P.S.K.)

<sup>2</sup> Departments of Biochemistry & Molecular Biology and Microbiology & Molecular Genetics, Oklahoma State University, Stillwater, OK 74078, USA; andrew.mort@okstate.edu (A.M.)

<sup>3</sup> Department of Physics, Ribeirão Preto School of Philosophy, Sciences and Literature, University of São Paulo, Ribeirão Preto BR-14040901, Brazil; ajcosta@usp.br (A.J.C.)

\* Correspondence: rolf.prade@okstate.edu (R.A.P.); ipolikarpov@ifsc.usp.br (I.P.); Tel.: +1-405-744-7522 (R.A.P.); +55-16-3373-8088 (I.P.)

42  
43  
44

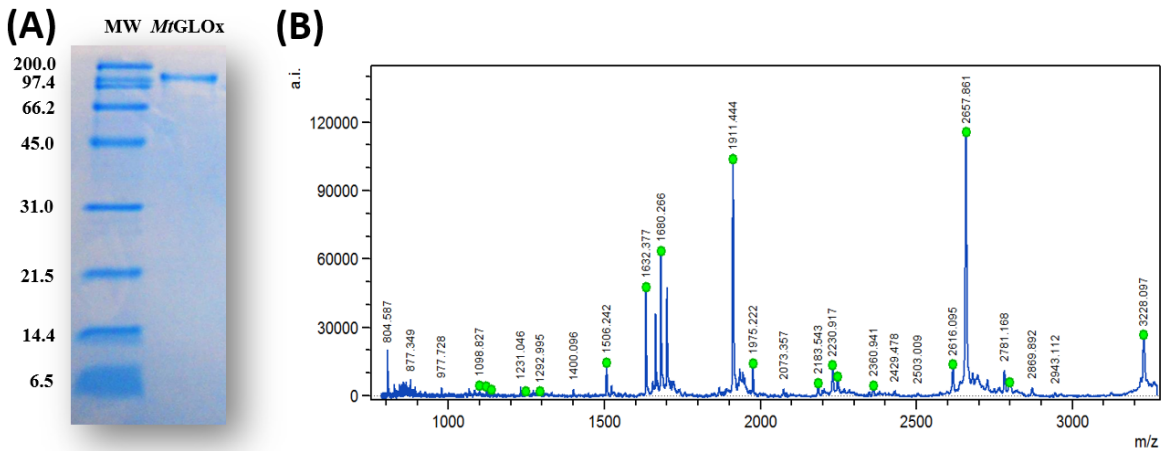

(C)  
**QLSIPTDLPDSWEYQGCYTDVPGR**TINSASYADGTNMTNAACLSYCASKGFPYAGTEYSVEFCGTTLA  
SSSAKVADSECNMPCSGAPSEPCGAGSRLSLFHSSAVTGPAANPGVNDFTHLGCYAEKGTGRALTYNP  
GLPGADMTVAKCTAACRAANYILAGVEYGGECYCGNTIANGGAPADSGCSMVCNGNSTEFCGGPDRLN  
VYSYKNQYEPTATSTTGAGSTSSSSVPSATGLPEGWSYQGCWIDGK**QGRILPYQLPDSQTNSRAACAN**  
ACAEAGYTVSGTEYAVQFCGDAIHNGGVETDEADCSTPCPGAPGEK**CGAGDRLSIVSRGPPKIYAPPA**  
**PIEKIGDWEYQGCAEDNINDKR**TFFWQIFFNDIMTPEMCLDRCAEFGYHAAGLEYGQECYCGDPANMA  
THGATFRPESECNVVCAGNSTAICGGLARLTTYFWIGTPFYSWDFPQDWR**AGKYEFLVDGVNIPLIHTET**  
**ITGKVSFISKGATGPGNETGAYEFDPATLEFRELHIKTDVFCAASVTLDPKAGRQLNVGGWAGEATYGTR**  
**LYWPDGAPGVPGTHDWQENVNLHLQAGR**WYPSVLVLTNGSVMVVGGLIGSNDAATPSIILPYTGTP  
PLYMDWLDRTHPNLYPFLCILPGGGIFVQYWNEAR**ILDVTFDTVKTLDPAGAPNDPK**GGRTYPLEG  
TAVLLPQKYPTDPLGLVLCGGSTEGPGNALDNCVSIYPEADEPEWQIERMPSFRVMTCMAPLPDGTYLI  
ANGALHGVA GFGLGVGNL NALLYDPSKPLGSRITVAANTTIAR**MYHSEAITLLDGRVLISGSNPEDGVN**  
**PEEYRVEVFLPPYLLAGKPRPTFTLENRDWAHGQTGIPFTLGSPARNGDITATLLGSVASTHGNSMGAR**  
**TLMPRVSCR**GTSTVDAPPTANICPPGWYQFFVLDGGIPAVGVYVRI**IGGDAGQIGNWPQAPDFSVPGV**

45  
46  
47  
48  
49  
50  
51  
52  
53  
54  
55  
56  
57  
58  
59  
60  
61  
62

**Figure S1.** Identification of the purified *MtGLOx* heterologously expressed and secreted by *Aspergillus nidulans*. (A) SDS-PAGE showing the purified *MtGLOx*. MW: molecular weight. (B) MALDI-TOF/MS peptide mass fingerprint analysis of *MtGLOx*. Mass spectrum profile in the *m/z* range 800-3300 Da. The peptide mass fingerprint was made from fragments of *MtGLOx* after tryptic digestion. Green dots mark the expected tryptic masses that matches the theoretical *m/z* with a maximum 2 Da tolerance. (C) Protein identification and sequence coverage after *m/z* list analysis. The sequence coverage of the tryptic fragments is shown in bold red (31% coverage).

63  
64  
65  
66

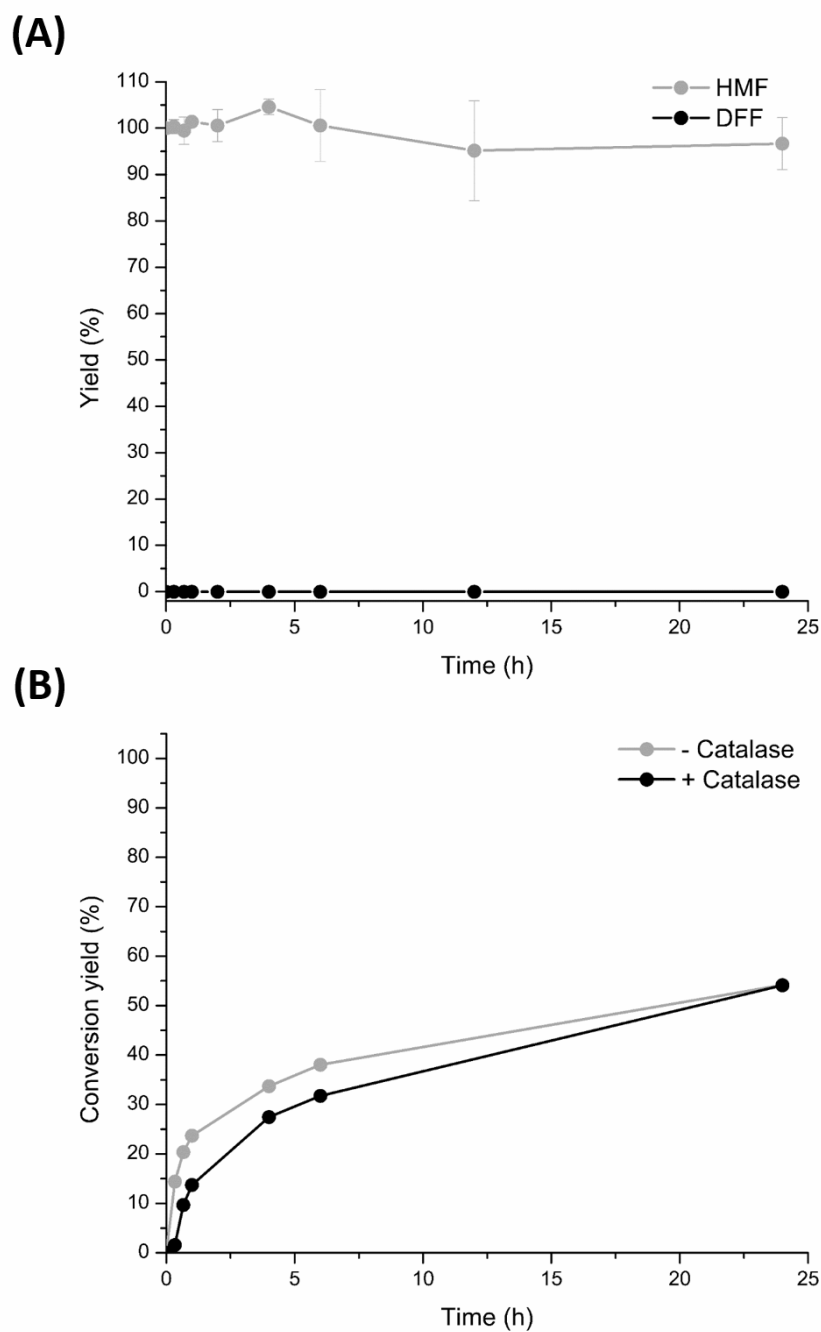

67  
68  
69  
70  
71  
72

**Figure S2.** Reaction controls of the time course oxidation of HMF by *MtGLOx*. (A) Effect of HMF incubation in 100 mM Bis-Tris pH 6.0. (B) Effect of catalase on time course conversion of HMF to DFF. The time course oxidation of HMF (1 mM) by *MtGLOx* (0.5  $\mu$ M) in 100 mM Bis-

73 Tris pH 6.0. The reaction was monitored by DFF quantification by High Performance Liquid  
74 Chromatography (HPLC), using a Bio-Rad Aminex HPX-87H column with and without 670  
75 U/mL of catalase from *Aspergillus niger* (Sigma-Aldrich).
